# Supplementary material for: A novel method for quantification of decabromodiphenyl ether in plastics without sample preparation using direct insertion probe – magnetic sector high resolution mass spectrometry
Source: Royal Society of Chemistry journal article supplement (doi:10.1039/c6ay00460a), 2016-01-01
Supplement: c6ay00460a1.pdf [file c6ay00460a1.pdf]

## A novel method for quantification of Decabromodiphenyl ether in plastics without sample preparation using Direct Insertion Probe – Magnetic Sector High Resolution Mass Spectrometry.

A. Guzzonato<sup>a,b</sup>, H. Mehlmann<sup>b</sup>, D. Krumwiede<sup>b</sup>, S.Harrad<sup>a</sup>.

### Supplementary Information

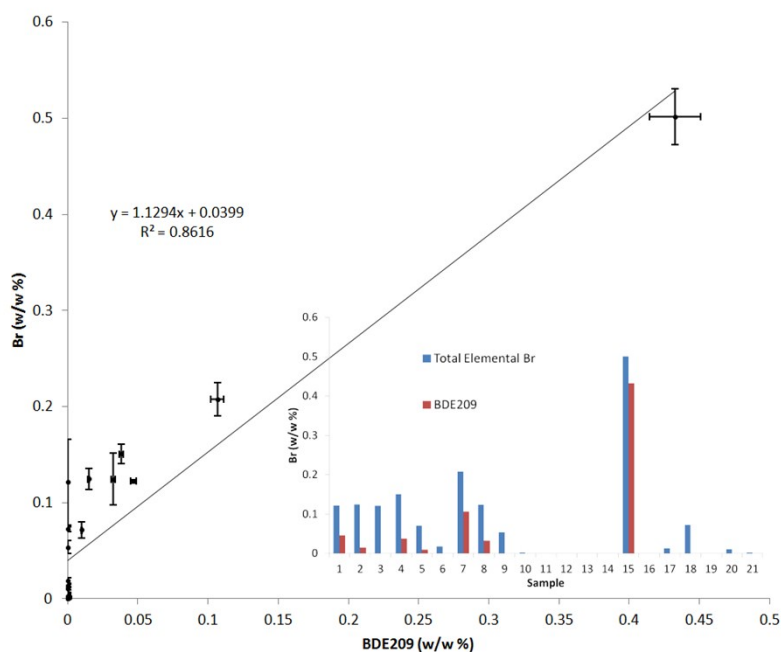

**Figure 1** Correlation between BDE209 measured with DIP-MS-HRMS and total elemental Br measured with X-Ray Fluorescence. Considering that these data refer to real samples, and thus contain a suite of different BFRs each contributing to the total elemental Br concentration, the proportionality between the BDE209 concentration and that of Br is clear. In addition, the inset plot shows that on no occasion does the detected BDE209 (which is likely to be a fraction of the total BFR content) exceed the total detected Br. Error bars for X-Ray Fluorescence results are equal to 4 SD, for DIP-MS-HRMS to the relative measurement accuracy.

**Table 1** Comparison of DIP-MS-HRMS measurements of BDE-209 and those of Br recorded with X Ray Fluorescence.

| <b>Sample</b> | <b>Description</b>  | <b>BDE209 (w/w %)</b> | <b>Br (w/w %)</b> |
|---------------|---------------------|-----------------------|-------------------|
| 1             | Coffee cup lid      | 0.046772567           | 0.122153203       |
| 2             | Coffee cup lid      | 0.015056533           | 0.124649681       |
| 3             | Miniature Car       | <LOD                  | 0.121146101       |
| 4             | Miniature Car Frame | 0.038262267           | 0.150725521       |
| 5             | Rubik's cube        | 0.0098847             | 0.071483044       |
| 6             | Rubik's cube        | <LOD                  | 0.018397253       |
| 7             | Spring Car          | 0.106637167           | 0.20782717        |
| 8             | Spring Car          | 0.032492433           | 0.124255989       |
| 9             | Spring Car Base     | <LOD                  | 0.053600627       |
| 10            | Thermal coffee mug  | <LOD                  | 0.002147532       |
| 11            | Thermal coffee mug  | 0.0008831             | <LOD              |
| 12            | Toy Binocular       | <LOD                  | <LOD              |
| 13            | Toy Bowl            | <LOD                  | <LOD              |
| 14            | Toy Coin            | <LOD                  | <LOD              |
| 15            | Toy Gun             | 0.432703333           | 0.501407974       |
| 16            | Toy Gun             | <LOD                  | 0                 |
| 17            | Toy Shield          | <LOD                  | 0.01346358        |
| 18            | Toy Spring Gun      | <LOD                  | 0.072438773       |
| 19            | Toy Spring Gun      | <LOD                  | 0                 |
| 20            | Toy Sword           | <LOD                  | 0.010814214       |
| 21            | Toy Target          | <LOD                  | 0.002427124       |
